# Supplementary material
Source: PubMed Central journal article supplement (PMC6057147)

|                  | Total Spectra | FDR Spectra (%) | Distinct Peptides | FDR Distinct Peptide (%) | Protein Subgroups Identified <sup>a</sup> | Protein Subgroups Quantified <sup>b</sup> |
|------------------|---------------|-----------------|-------------------|--------------------------|-------------------------------------------|-------------------------------------------|
| <b>Patient 1</b> | 169295        | 0.43            | 37918             | 1.29                     | 4836                                      | 4464                                      |
| <b>Patient 2</b> | 173378        | 0.47            | 36186             | 1.49                     | 4780                                      | 4425                                      |
| <b>Patient 3</b> | 165812        | 0.45            | 35981             | 1.42                     | 4670                                      | 4335                                      |
| <b>Patient 4</b> | 126050        | 0.45            | 28843             | 1.26                     | 4280                                      | 4002                                      |
| <b>Overall</b>   | 634535        | 0.45            | 54742             | 2.36                     | 5304 (4555 <sup>c</sup> )                 | 4819 (4105 <sup>c</sup> )                 |

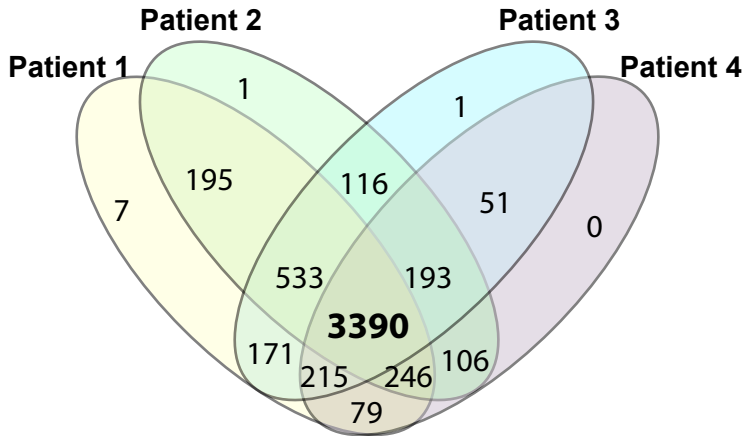

Supplement: NIHMS979745-supplement-Suppl_figure3.pdf [file NIHMS979745-supplement-Suppl_figure3.pdf]
