# Supplementary material
Source: PubMed Central journal article supplement (PMC6057147)

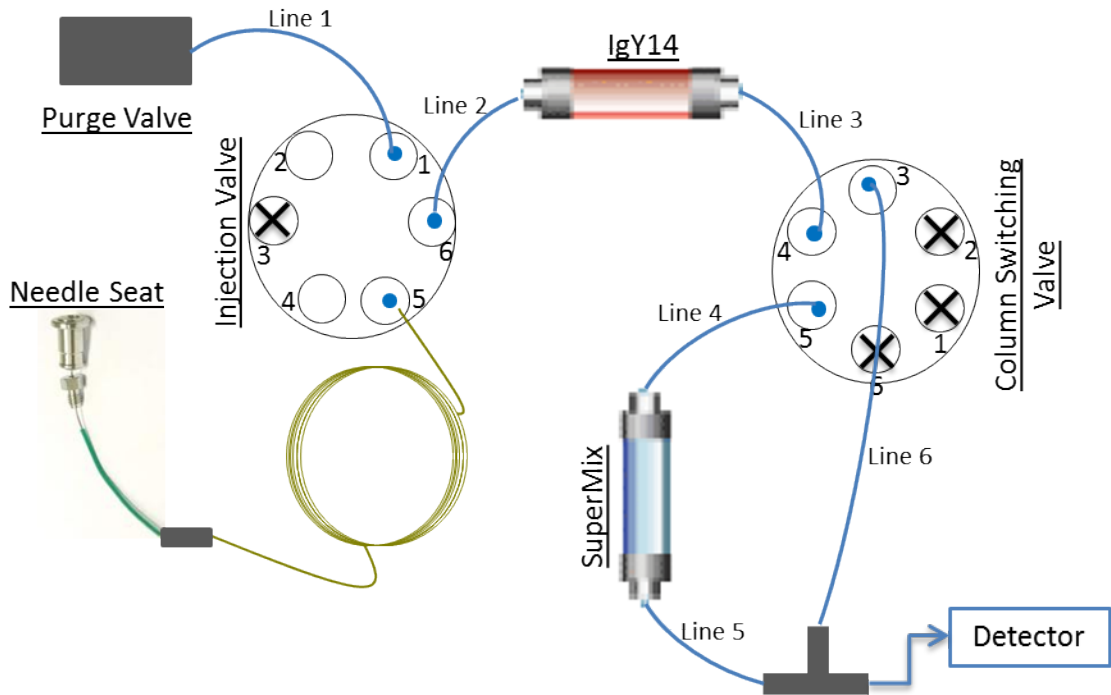

Supplement: NIHMS979745-supplement-Suppl_figure1.pdf [file NIHMS979745-supplement-Suppl_figure1.pdf]

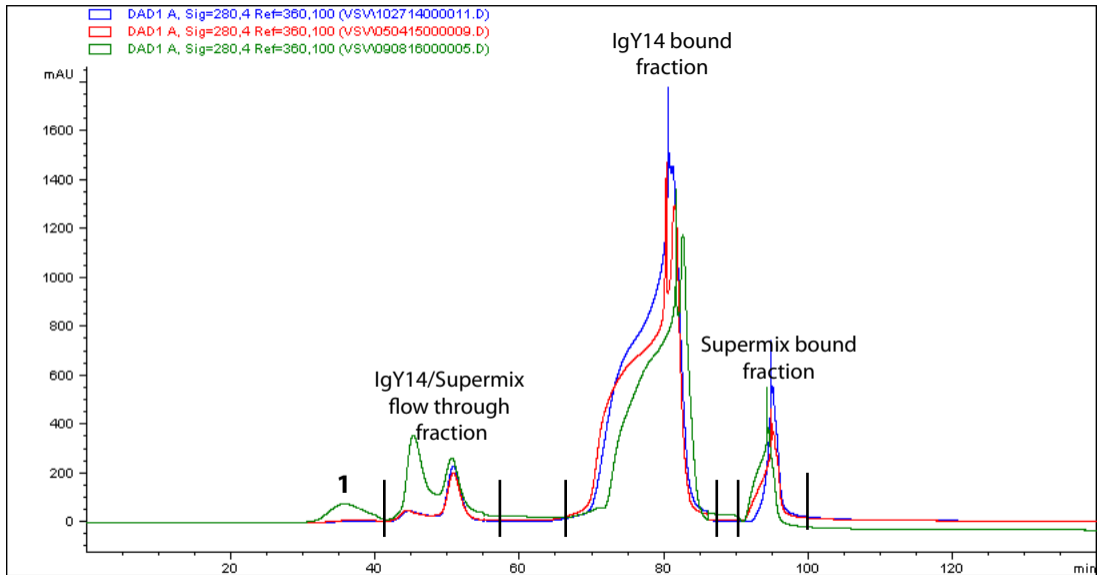

Supplement: NIHMS979745-supplement-Suppl_figure2.pdf [file NIHMS979745-supplement-Suppl_figure2.pdf]

**A**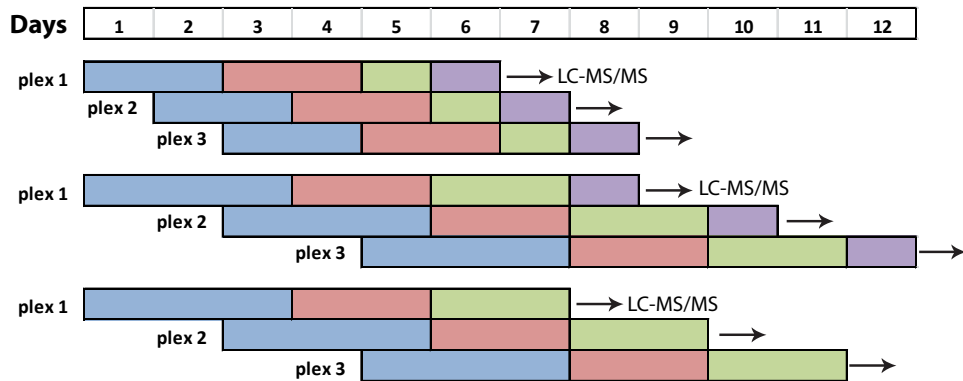**B**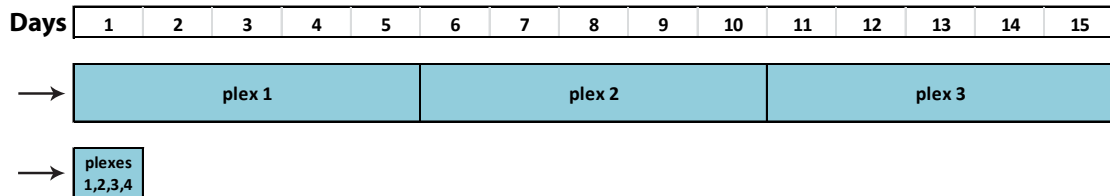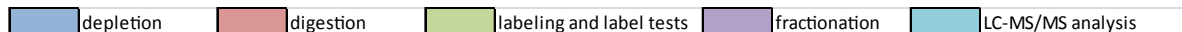

Supplement: NIHMS979745-supplement-Suppl_figure4.pdf [file NIHMS979745-supplement-Suppl_figure4.pdf]
